# Supplementary material for: Preparation of a nano-MnO2 surface-modified reduced graphene oxide/PVDF flat sheet membrane for adsorptive removal of aqueous Ni(ii)
Source: Royal Society of Chemistry journal article supplement (doi:10.1039/c5ra20776b), 2016-01-01
Supplement: c5ra20776b1.pdf [file c5ra20776b1.pdf]

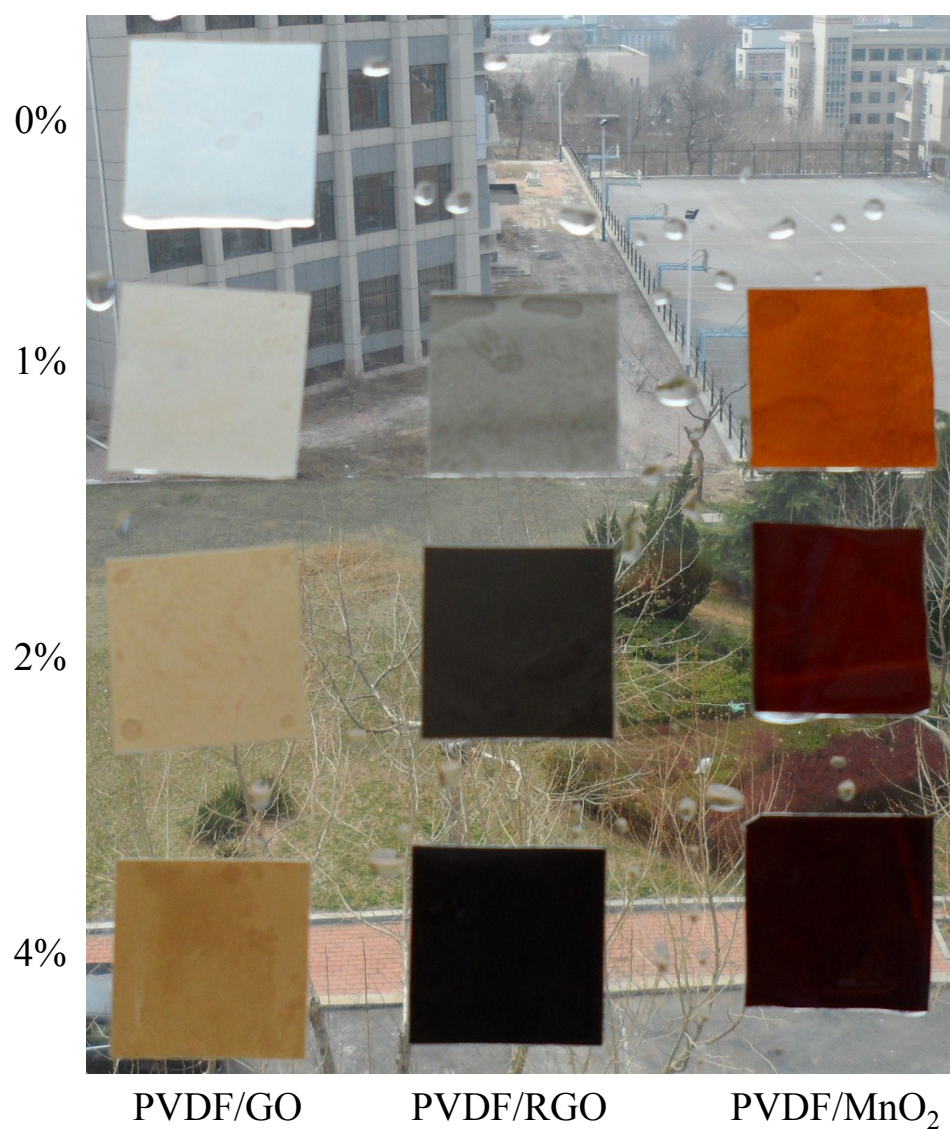

Fig. S1 Appearance of PVDF membrane and PVDF composite membranes.

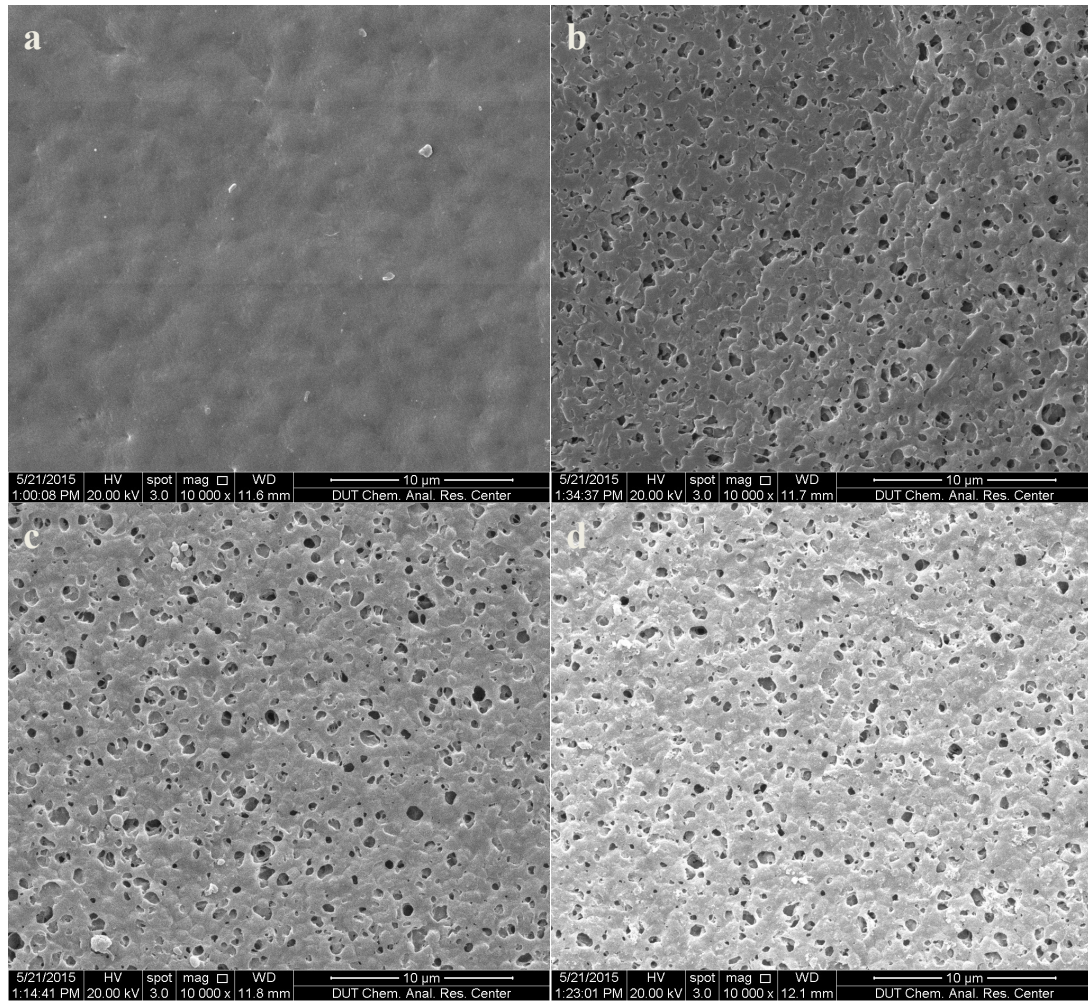

Figure S2 Bottom surface SEM images of (a) PVDF, (b) PVDF/GO, (c) PVDF/RGO and (d) PVDF/MnO<sub>2</sub>.

Table S1 Porous structure parameters of PVDF and PVDF composite membranes.

| Membrane              | BET surface area<br>(m <sup>2</sup> ·g <sup>-1</sup> ) | BJH desorption average pore<br>diameter<br>(nm) | BJH desorption Cumulative<br>volume of pores<br>(cc/g) |
|-----------------------|--------------------------------------------------------|-------------------------------------------------|--------------------------------------------------------|
| PVDF                  | 2.82 ± 0.18                                            | 0.06 ± 0.01                                     | 0.004 ± 0.001                                          |
| PVDF/GO               | 13.85 ± 0.94                                           | 1.38 ± 0.08                                     | 0.028 ± 0.001                                          |
| PVDF/RGO              | 15.55 ± 0.68                                           | 1.39 ± 0.08                                     | 0.034 ± 0.002                                          |
| PVDF/MnO <sub>2</sub> | 14.21 ± 0.58                                           | 1.37 ± 0.09                                     | 0.032 ± 0.002                                          |



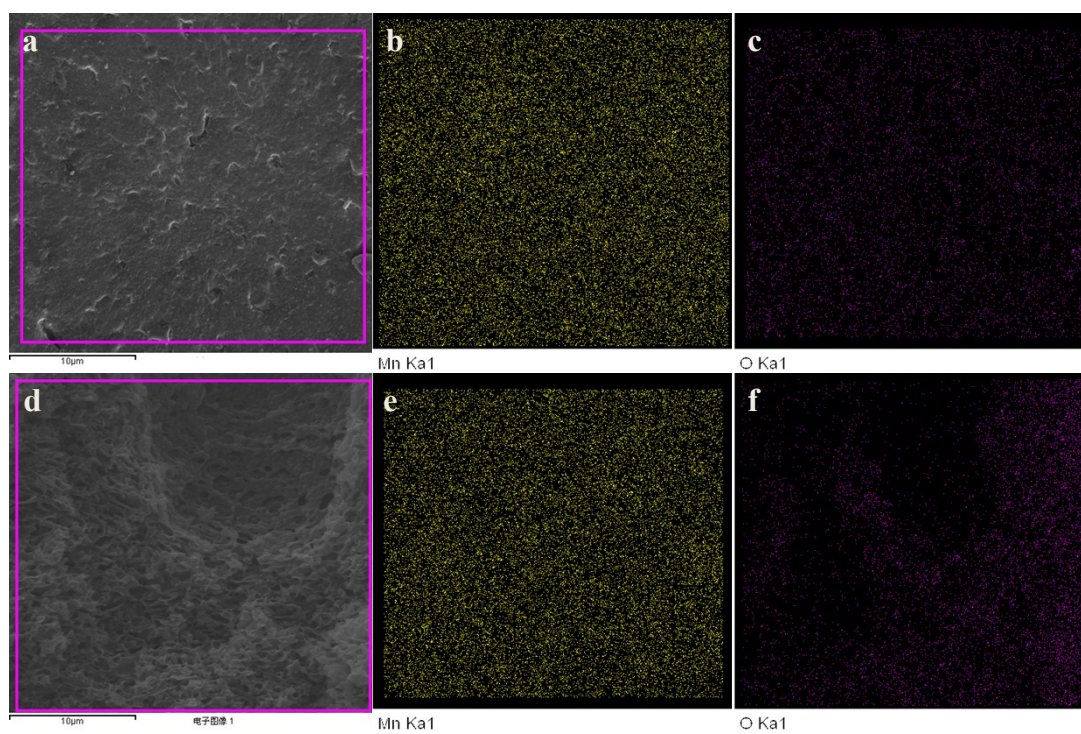

Figure S3 Upper surface of PVDF/MnO<sub>2</sub>: (a) SEM image, (b) manganese mapping and (c) oxygen mapping and cross-section of PVDF/MnO<sub>2</sub>: (d) SEM image, (e) manganese mapping and (f) oxygen mapping.

Table S2 Elemental analysis of PVDF membrane and PVDF composite membranes.

| Membrane                 | Location      | Atomic percent (%) |       |      |      |
|--------------------------|---------------|--------------------|-------|------|------|
|                          |               | C                  | F     | O    | Mn   |
| PVDF                     |               | 53.06              | 46.94 |      |      |
| PVDF/GO-4                |               | 52.64              | 45.35 | 2.01 |      |
| PVDF/RGO-4               | upper surface | 53.52              | 44.99 | 1.49 |      |
| PVDF/MnO <sub>2</sub> -1 |               | 48.80              | 49.09 | 1.64 | 0.47 |
| PVDF/MnO <sub>2</sub> -2 |               | 49.33              | 47.38 | 2.40 | 0.89 |
| PVDF/MnO <sub>2</sub> -4 | cross-section | 50.09              | 44.31 | 3.96 | 1.64 |
| PVDF/MnO <sub>2</sub> -4 |               | 50.53              | 44.65 | 3.75 | 1.07 |

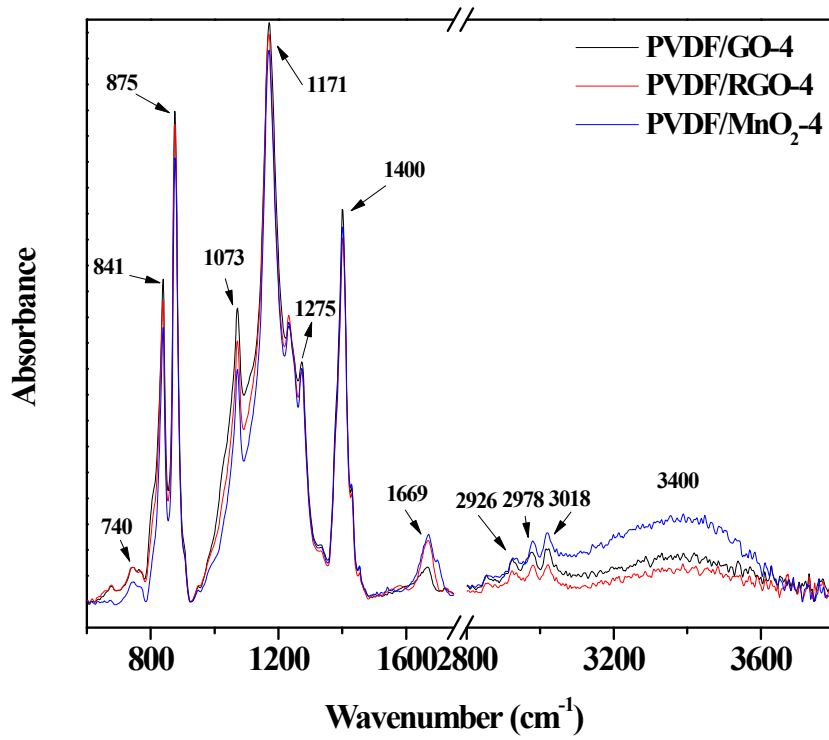

Figure S4 ATR-FTIR spectra of PVDF composite membranes.

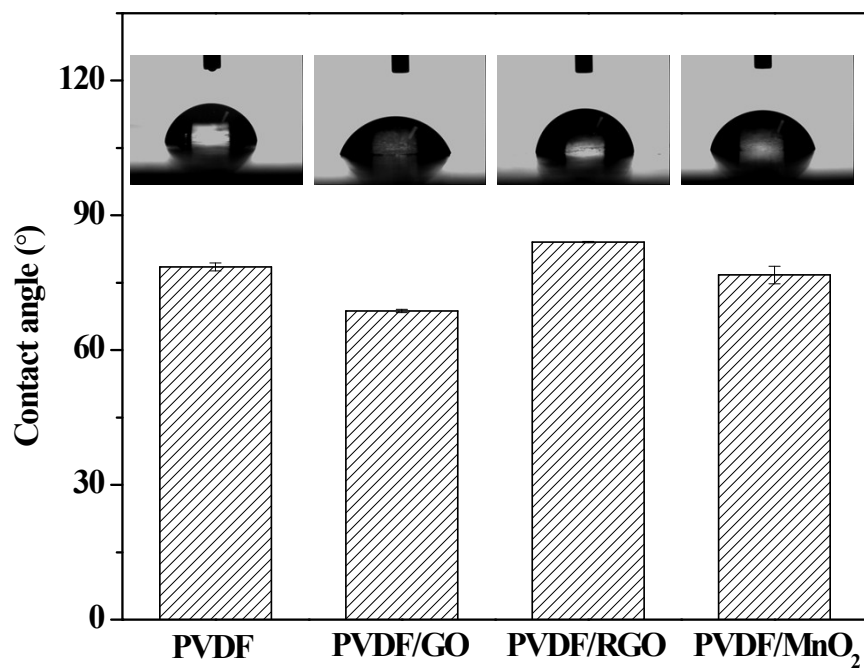

Figure S5 Contact angle comparison of PVDF, PVDF/GO, PVDF/RGO and PVDF/MnO<sub>2</sub> membranes.

Table S3 Value of thermodynamic parameters for adsorption of Ni(II) on PVDF/MnO<sub>2</sub>-4 membrane.

| Thermodynamic parameters                             | Temperature (K) |       |       |
|------------------------------------------------------|-----------------|-------|-------|
|                                                      | 298             | 308   | 318   |
| $K_0$                                                | 22.88           | 29.78 | 34.80 |
| $\Delta G^0$ (kJ·mol <sup>-1</sup> )                 | -7.76           | -8.69 | -9.38 |
| $\Delta H^0$ (J·mol <sup>-1</sup> ·L <sup>-1</sup> ) | 81.48           | 81.48 | 81.48 |
| $\Delta S^0$ (kJ·mol <sup>-1</sup> )                 | 16.49           | 16.49 | 16.49 |



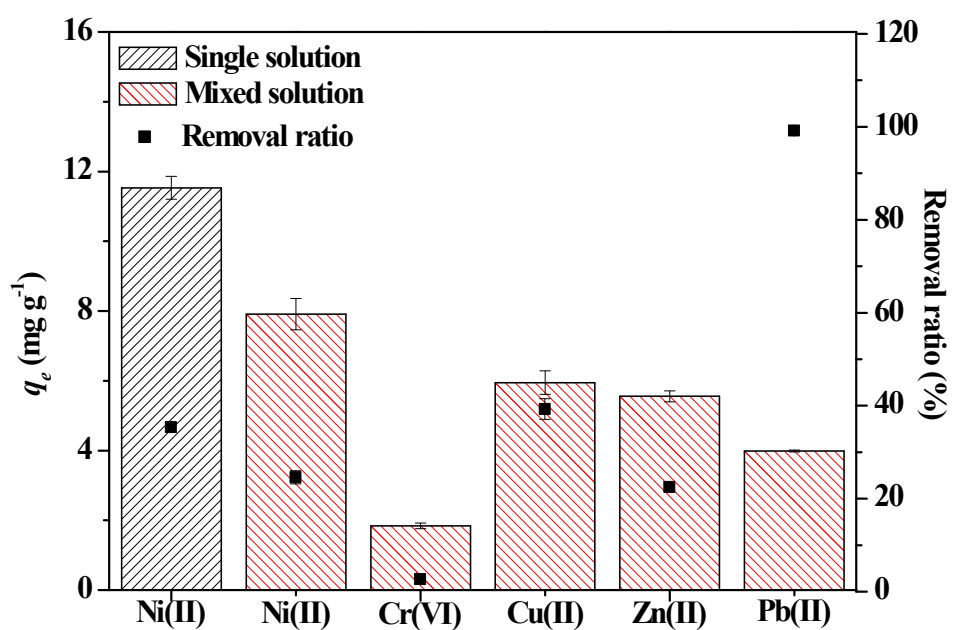

Figure S6 Adsorption of various heavy metal ions by PVDF/MnO<sub>2</sub> composite membrane from a simulated wastewater sample.

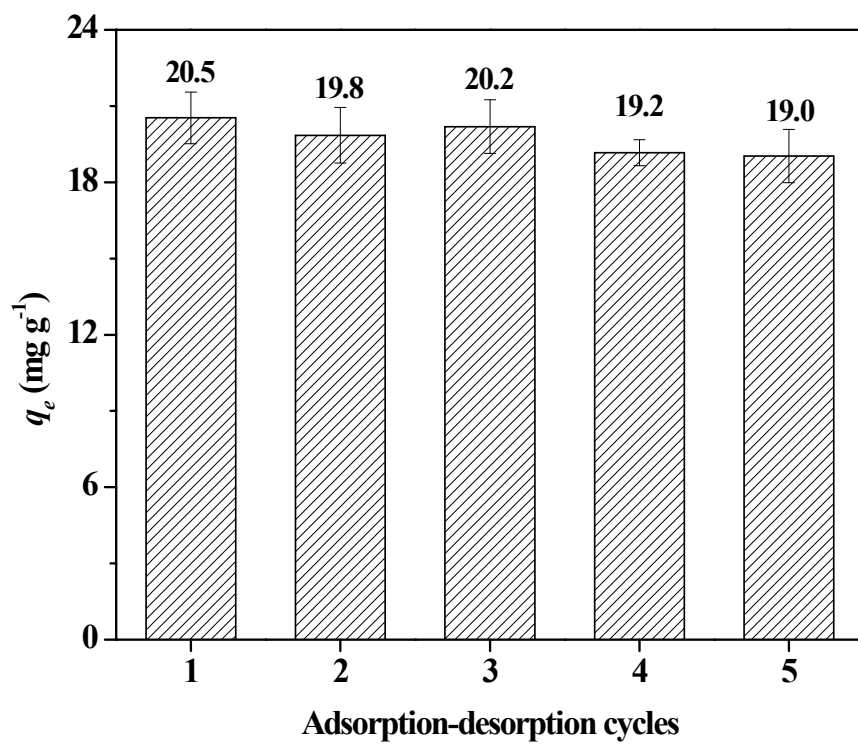

Figure S7 Desorption of Ni(II) from metal loaded PVDF/MnO<sub>2</sub> membrane using 0.1 M HNO<sub>3</sub> solution.

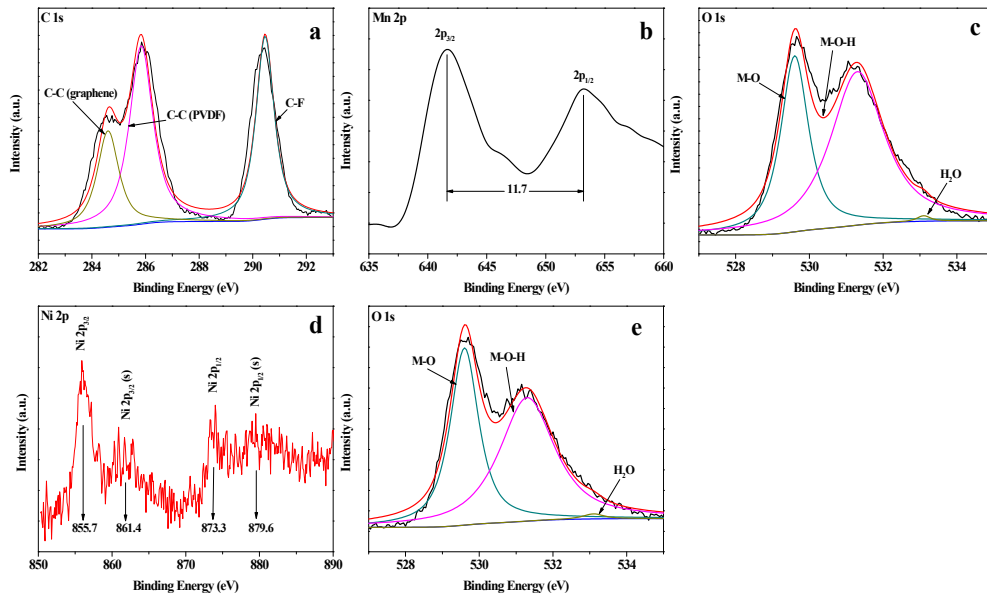

Figure S8 XPS spectra of PVDF/MnO<sub>2</sub> before and after adsorption of Ni(II): (a) C 1s, (b) Mn 2p, (c) O 1s of PVDF/MnO<sub>2</sub> before adsorption, (d) Ni 2p of PVDF/MnO<sub>2</sub> after adsorption and (e) O 1s of PVDF/MnO<sub>2</sub> after adsorption.
